# Supplementary material for: Universal scaling laws of keyhole stability and porosity in 3D printing of metals
Source: Research Square preprint supplement (doi:10.21203/rs.3.rs-94648/v1), 2020-10-28
Supplement: Supplementary file 1 [file c00311717f1f9259039e3c23.pdf]

# Supplementary Materials for

Universal scaling laws of keyhole stability and porosity in 3D printing of metals

Zhengtao Gan, Orion L. Kafka, Niranjana Parab, Cang Zhao, Lichao Fang, Olle Heinonen, Tao Sun, Wing Liu.

Correspondence to: zhengtao.gan@northwestern.edu, w-liu@northwestern.edu.

## **This PDF file includes:**

Supplementary Text

Figs. S1 to S9

Tables S1 to S3

Captions for Movies S1 to S11

## **Other Supplementary Materials for this manuscript include the following:**

Movies S1 to S11

Data S1 to S2

## Supplementary Text

### Multiphysics modeling of keyhole-mode laser melting

A multiphysics model is developed to capture the complex physical phenomena in keyhole-mode laser melting, including multiple reflection of laser beam, heat and mass transfer, Marangoni flow, vaporization-induced recoil pressure, and transport of metal vapor plume. In the computational implementation, the computational domain, including a gas domain and a substrate domain, is compared with the x-ray experimental configuration in Fig. S3. The volume fractions of gas and substrate phases are defined as  $\alpha_g$  and  $\alpha_l$ , respectively, and they sum to unity

$$\alpha_l + \alpha_g = 1 \quad (1)$$

The volume fraction equations for gas and substrate phases can be written as

$$\frac{\partial \alpha_g}{\partial t} + \nabla \cdot (\vec{u} \alpha_g) = \frac{\dot{m} \nabla \alpha_g}{\rho_g} \quad (2)$$

$$\frac{\partial \alpha_l}{\partial t} + \nabla \cdot (\vec{u} \alpha_l) = -\frac{\dot{m} \nabla \alpha_l}{\rho_l} \quad (3)$$

where  $t$  is the time,  $\vec{u}$  is the velocity,  $\dot{m}$  is the mass transfer rate due to vaporization, and  $\rho_g$  denotes the density of the gas phase and  $\rho_l$  denotes the density of the substrate phase, such that the total density at a point  $\rho = \rho_g \alpha_g + \rho_l \alpha_l$ . The unit normal vector  $\vec{n}$  and curvature  $\kappa$  of the interface  $\Gamma$  can be calculated from the volume fraction:

$$\vec{n} = \frac{\nabla \alpha_l}{|\nabla \alpha_l|} = \frac{-\nabla \alpha_g}{|\nabla \alpha_g|} \quad (4)$$

$$\kappa = -\nabla \cdot \vec{n} \quad (5)$$

Momentum conservation is governed by the Navier-Stokes equation:

$$\frac{\partial}{\partial t} (\rho \vec{u}) + \vec{u} \cdot \nabla (\rho \vec{u}) = -\nabla p + \nabla \cdot [\mu (\nabla \vec{u} + \nabla \vec{u}^T)] + \vec{f}_v + \vec{f}_s \quad (6)$$

where  $p$  is the pressure,  $\mu$  is the dynamic viscosity, and  $\vec{f}_v$  and  $\vec{f}_s$  denote the volumetric force and the continuum surface force (CSF) discretization of interfacial forces acting over the interface  $\Gamma$  between substrate and gas. The  $\vec{f}_v$  includes gravity  $\vec{f}_{gravity}$  and Darcy force  $\vec{f}_{Darcy}$ :

$$\vec{f}_v = \vec{f}_{gravity} + \vec{f}_{Darcy} = \rho \vec{g} - \frac{A_{mush}(1-f_{liq})^2}{(f_{liq}^3 + B)} \vec{u} \alpha_l \quad (7)$$

where  $\vec{g}$  is the gravitational acceleration,  $A_{mush}$  is the mushy zone constant,  $B$  is a small number to prevent division by zero, and  $f_{liq}$  is the liquid fraction that can be calculated from the temperature (29).

The interfacial forces include the surface tension force  $\vec{f}_{ST}$ , the Marangoni force  $\vec{f}_{Marangoni}$ , and the recoil force due to vaporization  $\vec{f}_{recoil}$ :

$$\vec{f}_s = \vec{f}_{ST} + \vec{f}_{Marangoni} + \vec{f}_{recoil} \quad (8)$$

Those forces can be expressed as

$$\vec{f}_{ST} = \sigma \kappa \nabla \alpha_l \quad (9)$$

$$\vec{f}_{Marangoni} = \frac{\partial \sigma}{\partial T} [\nabla T - \vec{n}(\vec{n} \cdot \nabla T)] |\nabla \alpha_l| \left( \frac{2\rho}{\rho_l + \rho_g} \right) \quad (10)$$

$$\vec{f}_{recoil} = (P_{recoil} - P_{atm}) \nabla \alpha_l \quad (11)$$

where  $\sigma$  is the surface tension coefficient,  $\frac{\partial \sigma}{\partial T}$  is the temperature coefficient of surface tension defined as the partial derivative of the surface tension coefficient with respect to temperature,  $P_{recoil}$  is the vaporization-induced recoil pressure, and  $P_{atm}$  is the atmospheric pressure.

To approximate the mass transfer rate  $\dot{m}$  and the recoil pressure  $P_{recoil}$  across the Knudsen layer, the Hertz-Langmuir relation (30) is typically used. Since the Hertz-Langmuir relation is only valid at high vaporization intensities (when temperature is much higher than boiling point or in vacuum), the  $\dot{m}$  is calculated by bridging the vaporization regimes with a smoothed third-order polynomial:

$$\dot{m} = \begin{cases} 0, & 0 \leq T \leq T_L \\ a_1 T^3 + b_1 T^2 + c_1 T + d_1, & T_L \leq T \leq T_H \\ (1 - \beta_R) \sqrt{\frac{M_l}{2\pi RT}} P_{sat}, & T_H \leq T \leq +\infty \end{cases} \quad (12)$$

where  $a_1$ ,  $b_1$ ,  $c_1$ , and  $d_1$  are fitting coefficients,  $\beta_R$  is the retro-diffusion coefficient,  $M_l$  is the molar mass of the vaporized species,  $\beta_R$  is the retro-diffusion coefficient,  $R$  is the gas constant, and the temperature thresholds  $T_L$  and  $T_H$  represent the low and high vaporization intensity regimes. The temperature-dependent saturated vapor pressure  $P_{sat}$  is calculated with the Clausius-Clapeyron law (31) as

$$P_{sat} = P_{atm} \exp \left[ \frac{M_l L_v}{RT_v} \left( 1 - \frac{T_v}{T} \right) \right] \quad (13)$$

where  $L_v$  is the latent heat of vaporization, and  $T_v$  is the boiling point at atmospheric pressure.

To consider the effects of the atmospheric pressure, the recoil pressure can be expressed as

$$P_{recoil} = \begin{cases} P_{atm}, & 0 \leq T \leq T_L \\ a_2 T^3 + b_2 T^2 + c_2 T + d_2, & T_L \leq T \leq T_H \\ \frac{1}{2} (1 + \beta_R) P_{sat}, & T_H \leq T \leq +\infty \end{cases} \quad (14)$$

where  $a_2$ ,  $b_2$ ,  $c_2$ , and  $d_2$  are fitting coefficients.

Energy conservation equation can be written as

$$\frac{\partial}{\partial t} (\rho H) + \nabla \cdot (\rho \vec{u} H) = \nabla \cdot (k \nabla T) + Q_s \quad (15)$$

$$H = h_{ref} + \int_{T_{ref}}^T c_p dT + f_{liq} L_m \quad (16)$$

where  $H$  is the enthalpy of the material,  $k$  is the thermal conductivity,  $T$  is the temperature,  $h_{ref}$  is the reference enthalpy with respect to the reference temperature  $T_{ref}$ ,  $c_p$  is the heat capacity, and  $L_m$  is the latent heat of melting. The source term  $Q_s$  represents the energy source applied on the interface between substrate and gas  $\Gamma$ , which includes radiative source  $Q_{rad}$ , laser source  $Q_{laser}$ , and evaporative source  $Q_{evp}$ :

$$Q_s = Q_{rad} + Q_{laser} + Q_{evp} \quad (17)$$

Those sources can be expressed as

$$Q_{rad} = -\sigma_{SB} \varepsilon (T^4 - T_{\infty}^4) |\nabla \alpha_l| \left( \frac{2\rho}{\rho_l + \rho_g} \right) \quad (18)$$

$$Q_{laser} = q_{laser} |\nabla \alpha_l| \left( \frac{2\rho}{\rho_l + \rho_g} \right) \quad (19)$$

$$Q_{evp} = -L_v \dot{m} |\nabla \alpha_l| \left( \frac{2\rho}{\rho_l + \rho_g} \right) \quad (20)$$

where  $\sigma_{SB}$  is the Stefan-Boltzmann constant,  $\varepsilon$  is the material emissivity,  $T_\infty$  is the ambient temperature. To account for the multiple reflection absorptions of laser beam, the absorbed energy flux  $q_{laser}$  is calculated using a ray tracing method (32,33):

$$q_{laser} = I_0(r) (\vec{I}_0 \cdot \vec{n}_0) \alpha_{Fr}(\theta_0) + \sum_{m=1}^N I_m(r, z) (\vec{I}_m \cdot \vec{n}_m) \alpha_{Fr}(\theta_m) \quad (21)$$

$$\alpha_{Fr}(\theta) = 1 - \frac{1}{2} \left[ \frac{1 + (1 - \alpha_0 \cos \theta)^2}{1 + (1 + \alpha_0 \cos \theta)^2} + \frac{\alpha_0^2 - 2\alpha_0 \cos \theta + 2\cos^2 \theta}{\alpha_0^2 + 2\alpha_0 \cos \theta + 2\cos^2 \theta} \right] \quad (22)$$

$$I_0(r) = \frac{2P}{r_0^2} \exp \left[ -\frac{2(r - V_s t)^2}{r_0^2} \right] \quad (23)$$

where  $I$  represents the laser energy flux,  $\vec{I}$  represents the unit vector of the beam,  $\theta$  represents the angle between the laser beam and normal of the keyhole interface  $\Gamma$ ,  $\vec{n}$  is the unit normal vector of the interface  $\Gamma$ . Subscript 0 denotes the incident beam and  $m$  denotes the  $m^{\text{th}}$  reflections. The Fresnel absorption coefficient  $\alpha_{Fr}$  is applied, and  $\alpha_0$  is a coefficient related to the types of lasers and materials,  $P$  is the laser power,  $r_0$  is the laser spot radius,  $V_s$  is the scan speed,  $r$  is the radial coordinate, and  $z$  is the usual  $z$ -coordinate. More detailed calculation of the ray tracing method and its validation are provided elsewhere (3). An illustrative result of the ray tracing is shown in Fig. S4.

A conservation equation for metal vapor concentration in the gas phase is coupled with the momentum conservation equation:

$$\frac{\partial}{\partial t} (\rho_g \alpha_g Y_l) + \nabla \cdot (\vec{u} \rho_g \alpha_g Y_l) = \nabla \cdot (\alpha_g \rho_g D \nabla Y_l) + \dot{m} |\nabla \alpha_l| \quad (24)$$

where  $Y_l$  represents the mass fraction of substrate species (one major component in the substrate is considered in this study) and  $D$  is the mass diffusion coefficient. The gas density is defined using the ideal gas law for an incompressible flow:

$$\rho_g = \frac{p_{op} [M_l Y_l + M_g (1 - Y_l)]}{RT} \quad (25)$$

where  $p_{op}$  is the operating pressure in the experimental chamber,  $M_g$  is the molar mass of the gas (e.g., argon), and  $M_s$  is the molar mass of the substrate (e.g., aluminum) species.

External boundaries of computational domain are assumed to be adiabatic since they are sufficiently far from the heat source and the processing time is sufficiently short. A no slip condition for momentum equations and a zero diffusive flux for the species equation are set on the external boundaries except the top boundary, which is set as a fluid outlet with ambient pressure and zero mass fraction of the substrate species.

The governing equations are solved by finite volume method using the non-iterative PISO scheme within ANSYS FLUENT 2020 R1 (34) using the user-defined functions (UDFs). The Second Order Implicit Scheme is used for the transient formulation. The Least Squared Cell-Based scheme is used to compute gradients, PRESTO is used to compute pressures, and Second Order Upwind is used for momentum spatial discretization. An explicit Volume of Fluid (VOF) solver is applied with the CICSAM discretization scheme (35). The energy equation is discretized using the Power Law scheme, and the species equation is discretized using the Second Order Upwind scheme. An automatic local grid refinement technique is used. A uniform hexahedral mesh with an edge length of 8  $\mu\text{m}$  is used initially, and then two levels of local refinement (mesh edge length down to 2  $\mu\text{m}$ ) is specified when the temperature associated with

the region is higher than the solidus temperature of the material. A variable time step ranging from  $1 \times 10^{-10}$  to  $1 \times 10^{-8}$  s is used such that the global Courant number is smaller than one.

Thirty simulations with different laser power and scan speed are conducted (ten for the Al6061 substrate and twenty for the Ti-6Al-4V substrate). The thermophysical properties are provided in Table S1, and the computational parameters are given in Table S2. Quantitative comparisons of keyhole aspect ratio and melt pool size between x-ray experiments and multiphysics simulations are presented in Figs. S5 and S6.

### Energy balance calculation and approximation

The energy balance in laser melting or additive manufacturing can be expressed as

$$E_{laser} = E_{reflect} + E_{convect} + E_{radiate} + E_{evaporate} + E_{spatter} + E_{conduct} \quad (26)$$

where  $E_{laser}$  is the total laser energy deposited during the process,  $E_{reflect}$  is the reflected energy,  $E_{convect}$  is the convection energy losses,  $E_{radiate}$  is the radiation energy loss and  $E_{spatter}$  is the spattering energy loss. The portion of energy transferred within the substrate due to conduction is denoted by  $E_{conduct}$ .

A power balance can be obtained by deriving the energy balance equation with respect to time, such that a transient power balance or averaged power balance during a period of time can be analyzed:

$$P_{laser} = P_{reflect} + P_{convect} + P_{radiate} + P_{evaporate} + P_{spatter} + P_{conduct} \quad (27)$$

where  $P_{laser}$  is equal to laser power  $P$ . Similarly, the laser power consists of power losses due to reflection  $P_{reflect}$ , convection  $P_{convect}$ , radiation  $P_{radiate}$ , evaporation  $P_{evaporate}$ , spattering  $P_{spatter}$ , and transferred power due to conduction  $P_{conduct}$ .

Those powers can be approximated based on the multiphysics model:

$$P_{reflect} = 1 - \iint_{\Gamma} q_{laser} dS \quad (28)$$

$$P_{convect} = \iint_{\Gamma'} \rho_g c_{pg} T \vec{u} \cdot \vec{n}_{\Gamma'} dS \quad (29)$$

$$P_{radiate} = \iint_{\Gamma} \sigma_{SB} \varepsilon (T^4 - T_{\infty}^4) dS \quad (30)$$

$$P_{evaporate} = \iint_{\Gamma} L_v \dot{m} dS \quad (31)$$

$$P_{conduct} = P_{absorb} - P_{convect} - P_{radiate} - P_{evaporate} - P_{spatter} \quad (32)$$

where the subscript  $g$  denotes the gas phase,  $\Gamma$  is the interface between substrate and gas, and  $\Gamma'$  is a flat surface at the top of the substrate (a schematic of those two interfaces is shown in Fig. S7). Other parameters have been described previously. These integrals are computed at each time step after the keyhole depression completes a rapid growth. Mean and standard deviation of the integrals during the quasi-steady state are recorded. The power loss due to spattering  $P_{spatter}$  cannot be accurately calculated from the current model. Alternatively, the average power loss due to spattering  $\bar{P}_{spatter}$  can be approximated as

$$\bar{P}_{spatter} = \frac{V_{spatter} \rho_l c_{pl} T_v}{t_0} \quad (33)$$

where  $V_{spatter}$  is the volume of spattered droplets that can be approximated from the x-ray images by assuming that the separated droplets are spherical (an illustrative result is shown in Fig. S8). The subscript  $l$  denotes the liquid phase, and  $t_0$  is the observation time of x-ray

imaging. Vaporization temperature  $T_v$  is used in the approximation because most of the spattered droplets are ejected from the keyhole depression region where the temperature is near the  $T_v$ . Experimentally, average power due to conduction can be measured by attached thermocouples (3). Those experimental data are used to validate the predicted data from the model.

### Mathematical derivation of scaling parameters

To correlate the keyhole size and aspect ratio with process parameters and material properties in a compact form, scaling laws are derived from normalized governing equations and boundary conditions with appropriate assumptions and simplifications. We begin with a heat conduction problem in a semi-infinite region without considering the powder layer, Marangoni flow, evaporation and spattering. Previous analysis of the energy balance has shown that energy loss due to evaporation and spattering can be ignored as comparison with heat conduction. We consider a well-developed keyhole or transition regime where the laser energy is high enough to melt the powder around the laser, and thus the effect of particle morphology on the keyhole is neglectable. Ultrahigh speed x-ray observation (2) and qualitative arguments (36) support this assumption. The effect of the Marangoni flow will be analyzed later. We neglect the latent heat of melting because it is much smaller than the energy required to heat material to the melting point and consequently only affects the temperature distribution near the mushy zone. We also assume temperature-independent thermophysical properties at the melting point in the derivation, a previous study indicates that the inclusion of the temperature-dependent thermophysical properties does not change the keyhole depth qualitatively (4).

We consider a laser beam scanning a substrate with the scan speed  $V_s$  along direction  $x$ . Direction  $y$  is the transverse coordinate, and  $z$  is the normal into the substrate surface. In a reference frame that moves with the laser beam at a fixed relative location, the temperature field is governed by

$$\rho C_p \left( \frac{\partial T}{\partial t} + \vec{u} \cdot \nabla T \right) = \nabla \cdot (k \nabla T) \quad (34)$$

$$\vec{u} = -V_s \cdot \vec{i} \quad (35)$$

where  $\rho$  is the density of the solid,  $C_p$  is the heat capacity,  $T$  is the temperature,  $\vec{u}$  is the velocity of the reference frame,  $V_s$  is the speed of the frame that is equal to scan speed of the heat source, and  $\vec{i}$  is the unit vector in the  $x$  direction. We substitute Equation 35 into Equation 34 and consider a steady state:

$$\frac{V_s}{\alpha} \frac{\partial T}{\partial x} + \nabla^2 T = 0 \quad (36)$$

where  $\alpha$  is the thermal diffusivity that is defined as  $\alpha = \frac{k}{\rho C_p}$ .

The boundary condition considering a Gaussian heat source can be expressed as

$$\begin{cases} k \frac{\partial T}{\partial z} = \frac{2\eta P}{\pi r_0^2} \exp \left[ -\frac{2(x^2 + y^2)}{r_0^2} \right], & z = 0 \\ T = T_0, & r \rightarrow \infty \end{cases} \quad (37)$$

where  $\eta$  is the effective laser absorptivity,  $P$  is the laser power,  $r_0$  is the laser spot radius,  $T_0$  is the preheat temperature, and  $r$  is defined as  $r = \sqrt{x^2 + y^2 + z^2}$ .

The goal of normalization is to acquire an equivalent but compact representation governed by a minimal set of dimensionless parameters. We define the dimensionless groups by dividing the temperature and spatial variables by their natural scaling factors, which are combinations of the dimensional parameters in this problem, as

$$x^* = \frac{x}{\delta_x} = \frac{x}{r_0} \quad (38)$$

$$y^* = \frac{y}{\delta_y} = \frac{y}{r_0} \quad (39)$$

$$z^* = \frac{z}{\delta_z} = z \sqrt{\frac{V_s}{\alpha r_0}} \quad (40)$$

$$T^* = \frac{T-T_0}{T_s} = \frac{(T-T_0)\pi\rho C_p \sqrt{\alpha V_s r_0^3}}{\eta P} \quad (41)$$

where superscript \* indicates the dimensionless parameter,  $\delta_x$ ,  $\delta_y$ , and  $\delta_z$  are the length scales in  $x$ ,  $y$ , and  $z$ , respectively, and we define  $\delta_x = \delta_y = r_0$  and  $\delta_z = \sqrt{\frac{\alpha r_0}{V_s}}$ . Thermal scale  $T_s$  is defined as  $T_s = \frac{\eta P}{\pi\rho C_p \sqrt{\alpha V_s r_0^3}}$  so that the normalized governing equation and boundary conditions have the most compact form possible, given by

$$\frac{V_s r_0}{\alpha} \frac{\partial T^*}{\partial x^*} + \nabla^{*2} T^* = 0 \quad (42)$$

$$\begin{cases} \frac{\partial T^*}{\partial z^*} = \exp[2(x^{*2} + y^{*2})], & z^* = 0 \\ T^* = 0, & r^* \rightarrow \infty \end{cases} \quad (43)$$

Based on the normalized Equations (42) and (43), we define  $p = \frac{\alpha}{V_s r_0}$  and the dimensionless temperature, which only depends on dimensionless coordinates and  $p$ :

$$T^* = f(x^*, y^*, z^*, p) \quad (44)$$

where the dimensionless parameter  $p$  represents the ratio between the thermal transfer speed  $\frac{\alpha}{r_0}$  and scan speed  $V_s$ .

We are also interested in the size of a specific isotherm, for example liquidus temperature  $T_l$ , so we define

$$T_l^* = \frac{(T_l - T_0)\pi\rho C_p \sqrt{\alpha V_s r_0^3}}{\eta P} \quad (45)$$

The maximum depth of the melting isotherm  $z_m^*$  is determined by the relation

$$T_l^* = g(x^*, y^*, z^*, p) \quad (46)$$

where  $y^* = 0$  and the position of the maximum depth can be found from the condition

$$\frac{\partial g}{\partial x} = 0 \quad (47)$$

Thus, the melt depth  $z_m^*$  is a function of  $T_m^*$  and  $p$  only

$$z_l^* = s(T_l^*, p) = s\left(\frac{(T_l - T_0)\pi\rho C_p \sqrt{\alpha V_s r_0^3}}{\eta P}, \frac{\alpha}{V_s r_0}\right) \quad (48)$$

In the keyhole mode or transition mode, the keyhole depth  $e$  is approximately equal to the melt pool depth  $z_m$ . Thus, the normalized keyhole depth is scaled by

$$e_z^* = \frac{e}{\delta_z} = \frac{e}{\sqrt{\frac{\alpha r_0}{V_s}}} = s(T_l^*, p) = s'\left(\frac{\eta P}{(T_l - T_0)\pi\rho C_p \sqrt{\alpha V_s r_0^3}}, \frac{\alpha}{V_s r_0}\right) \quad (49)$$

$$\text{Thermal diffusion length } \delta_z = \sqrt{\frac{\alpha r_0}{V_s}} \quad (50)$$

$$\text{Normalized enthalpy } \text{enth}^* = \frac{P}{(T_l - T_0) \pi \rho C_p \sqrt{\alpha V_s r_0^3}} \quad (51)$$

$$\text{Normalized diffusion length } L_d^* = \frac{\delta_z}{r_0} = \sqrt{\frac{\alpha}{V_s r_0}} \quad (52)$$

Thus, based on the above dimensional analysis the keyhole depth  $e$  normalized by thermal diffusion length  $\delta_z$  is a universal function of the normalized enthalpy  $\text{enth}^*$ , normalized diffusion length  $L_d^*$ , and the absorptivity  $\eta$ . We found a linear relationship between  $e_z^*$  and the ratio of  $\eta \text{enth}^*$  and  $L_d^*$  as

$$e_z^* \propto \frac{\eta \text{enth}^*}{L_d^*} \quad (53)$$

$$e^* = \frac{e}{r_0} = e_z^* L_d^* \propto \eta \text{enth}^* \quad (54)$$

The effects of liquid metal flow on the melt pool dynamics are governed by a set of dimensionless numbers:

$$\text{Ra} = \frac{\rho g \beta (T_l - T_0) r_0^3}{\mu \alpha} \quad (55)$$

$$\text{Ma} = \left| \frac{d\sigma}{dT} \right| \frac{(h_l - h_0) r_0}{C_p \mu \alpha} \quad (56)$$

$$\text{Pr} = \frac{\mu}{\rho \alpha} \quad (57)$$

$$\text{We} = \frac{\rho U_\sigma^2 r_0}{\sigma} \quad (58)$$

$$\text{Bo} = \frac{\rho g r_0^2}{\sigma} \quad (59)$$

$$\text{Ca} = \frac{\mu U_\sigma}{\sigma} \quad (60)$$

$$U_\sigma = \left| \frac{d\sigma}{dT} \right| \frac{(h_l - h_0)}{C_p \mu} \quad (61)$$

where Rayleigh number  $\text{Ra}$  is associated with buoyancy-driven flow, Marangoni number  $\text{Ma}$  characterizes the Marangoni flow, and Prandtl number  $\text{Pr}$  affects the morphology of the melt pool driven by Marangoni flow (37). The Weber number  $\text{We}$ , Bond number  $\text{Bo}$  and Capillary number  $\text{Ca}$  affect the shape of the melt pool free surface (37). Table S3 lists the values of those dimensionless numbers for three substrate materials investigated in this study: Al6061, Ti6Al4V, and SS316. Those dimensionless numbers are roughly on the same order of magnitude, implying that fluid flow is similar for different materials under the same process conditions. Thus, ignoring the parameters associated with fluid flow in the melt pool dose not significantly affect the scaling for keyhole depth or aspect ratio.

Based on a procedure similar to those discussed above, scaling laws for the front angle and inlet length of keyhole can also be obtained as shown in Fig. S9 (Data S1). The keyhole front angle is approximately proportional to the keyhole aspect ratio, and thus it correlates well with



the Keyhole number. We also conclude that the normalized keyhole inlet length  $l^* = \frac{l}{r_0}$  is dominated by the normalized diffusion length  $L_d^*$ .

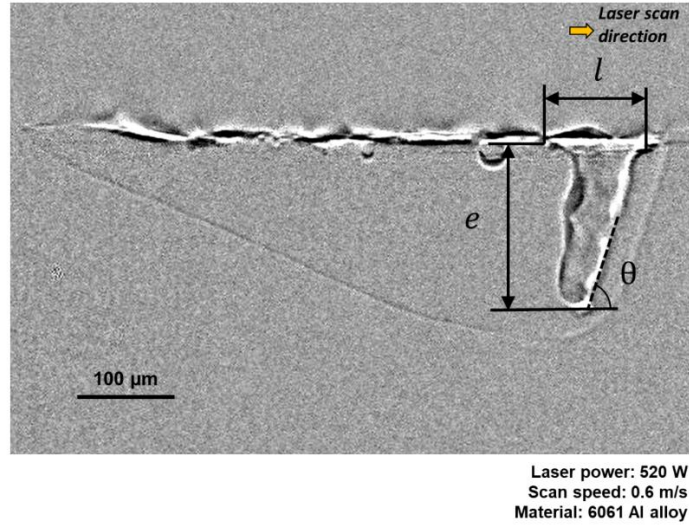

**Fig. S1. Representative x-ray image of the melt pool and keyhole depression after the processing steps described have been conducted. Keyhole depth  $e$ , inlet length  $l$ , and front angle  $\theta$  are marked in the image.**

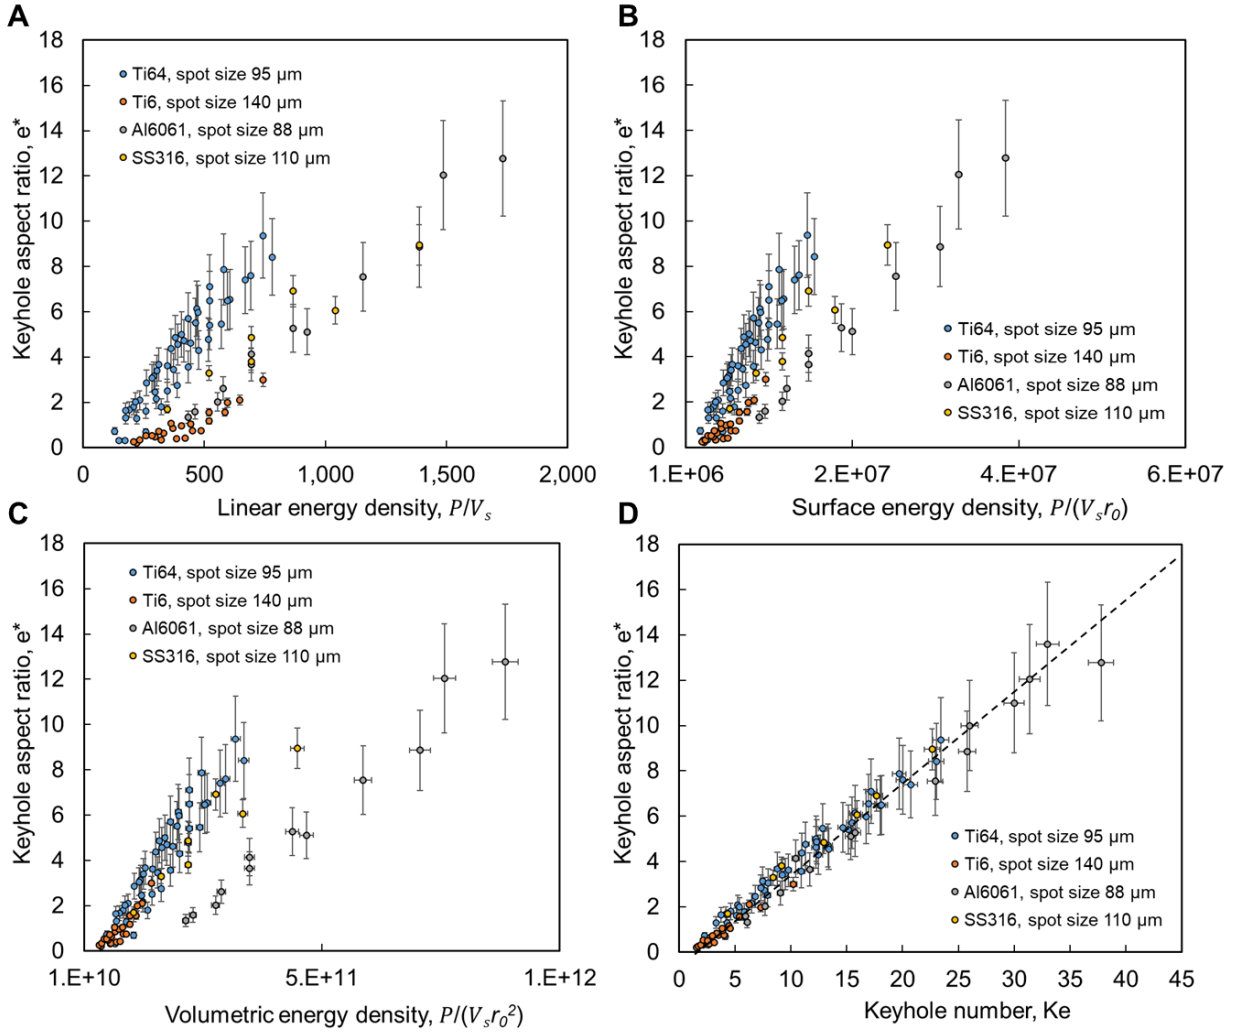

**Fig. S2. Correlation between keyhole aspect ratio and different descriptors:** (A) Linear energy density. (B) Surface energy density. (C) Volumetric energy density. (D) Keyhole number. All the data collapse to a single curve when the Keyhole number is used as descriptor.

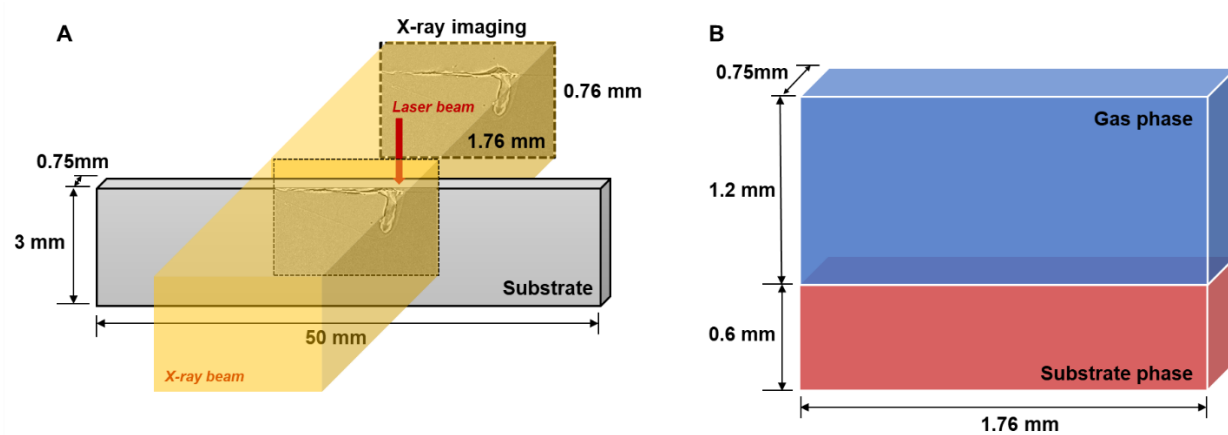

**Fig. S3. X-ray experimental configuration and computational domain.** (A) Size of sample and x-ray imaging region. (B) Computational domain size.

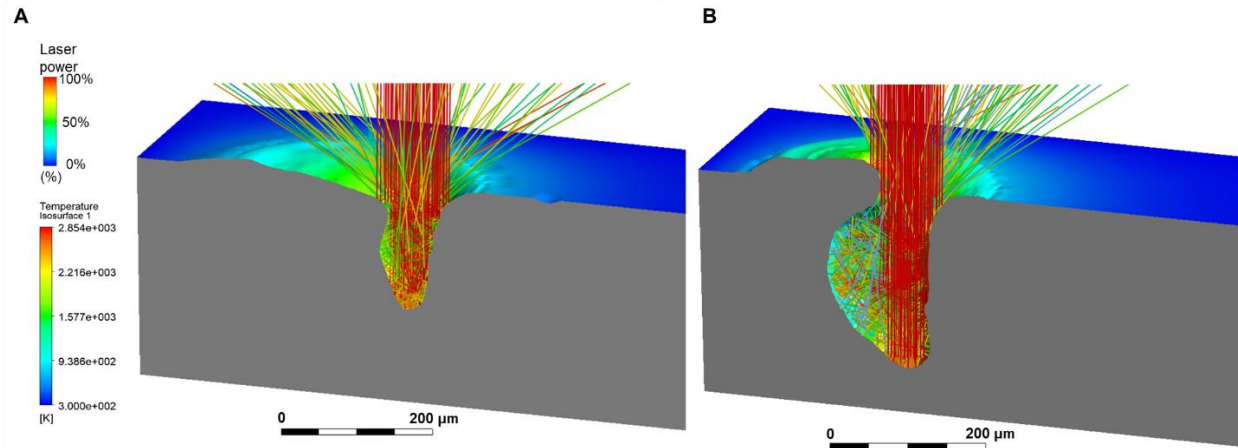

**Fig. S4. An illustrative result of the ray tracing method. Half of the domain is shown. The laser rays are colored by relatively power. The incoming rays arrive at 100% power and lose energy upon reflection. (A) The case with laser power 416 W, scan speed 0.6 m/s, and material Al6061. (B) The case with laser power 520 W, scan speed 0.45 m/s, and material Al6061.**

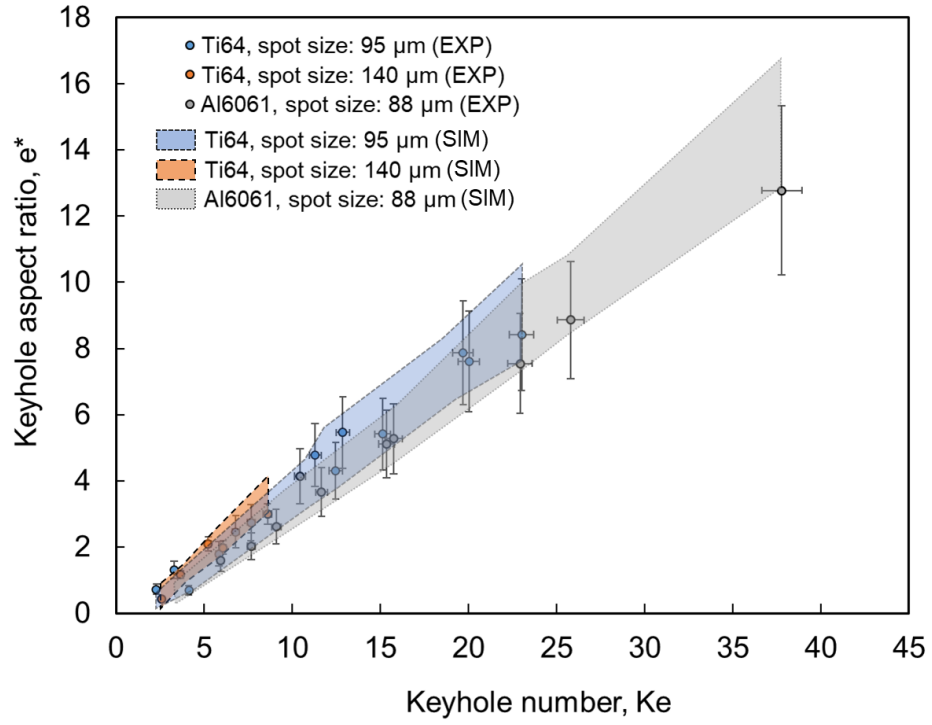

**Fig. S5. Comparison between experimental (EXP) and simulation (SIM) keyhole aspect ratios with different process parameters and materials.**

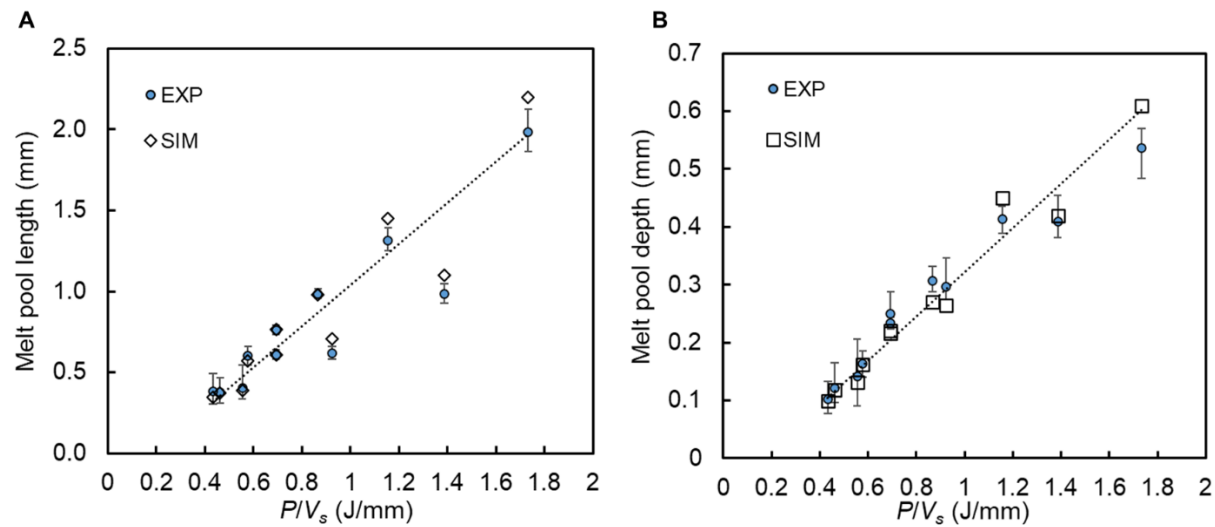

**Fig. S6. Comparison between experimental (EXP) and simulation (SIM) melt pool sizes for aluminum alloy Al6061. (A) melt pool length. (B) melt pool depth.**

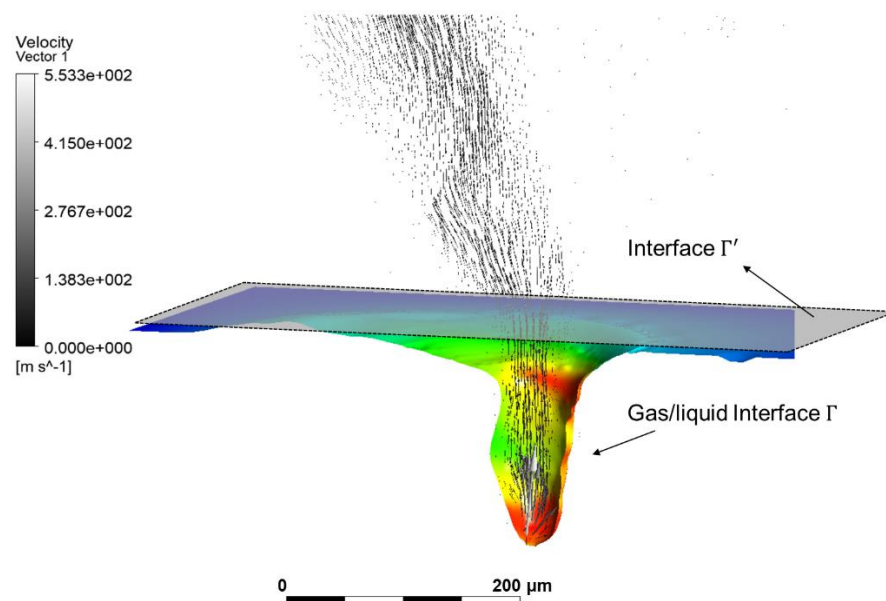

**Fig. S7.** A schematic of the two interfaces used to compute for energy balance. Vapor plume velocity is showed as an arrow field.



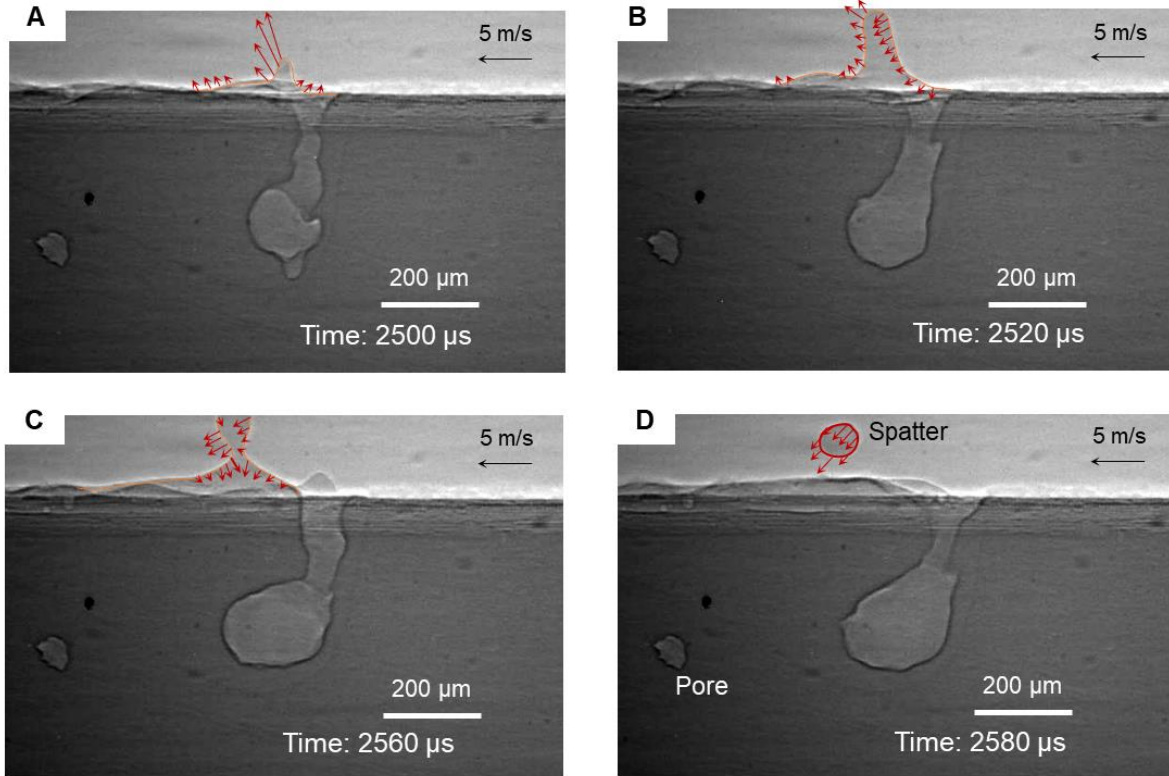

**Fig. S8. X-ray image series showing the spatter formation and evolution in laser melting of Al6061. The red arrows show the velocity vector of the interface of spatter droplet. A reference velocity, 5 m/s, is given.**

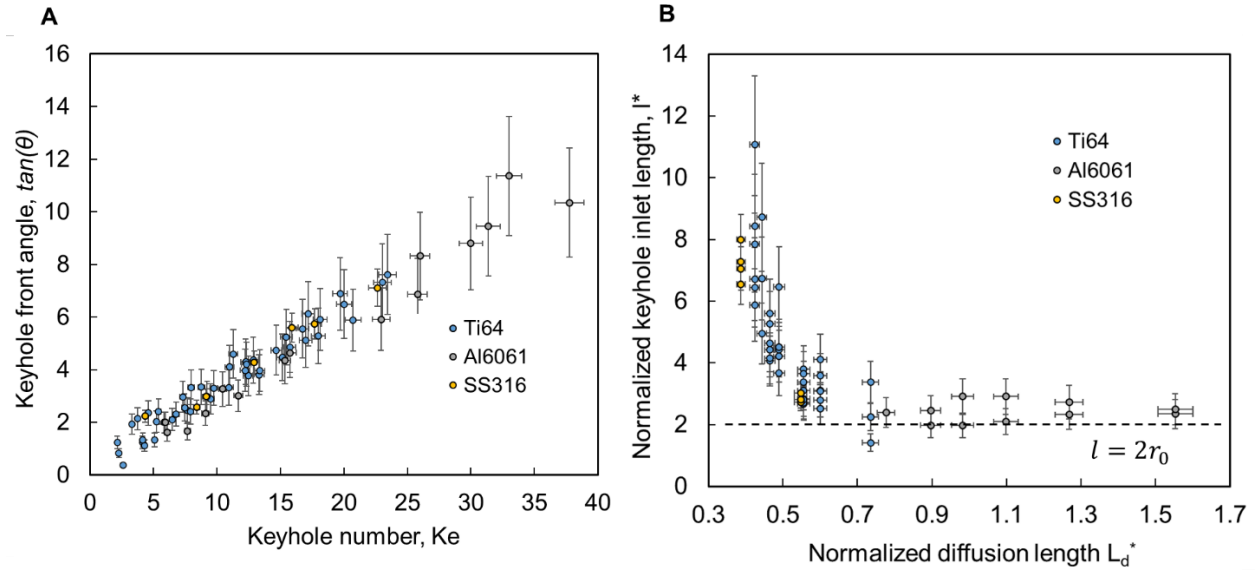

**Fig. S9. Scaling relations for the front angle and inlet length of keyhole.** (A) For tangent of the keyhole front angle. (B) For keyhole inlet length. A horizontal line denotes where the keyhole inlet length equals to laser beam diameter.

| Properties & units                                                                            | Ti64                                                | Al6061                                        | SS316                                             |
|-----------------------------------------------------------------------------------------------|-----------------------------------------------------|-----------------------------------------------|---------------------------------------------------|
| Density $\rho_l$ ( $\frac{kg}{m^3}$ )                                                         | 4420, T < 1933 K<br>3920, T $\geq$ 1933 K           | 2705, T < 915 K<br>2415, T $\geq$ 915 K       | 7950, T < 1723 K<br>6881, T $\geq$ 1723 K         |
| Heat capacity (liquid)<br>$C_{pl}$ ( $\frac{J}{kg \cdot K}$ )                                 | 0.1734T+452.72, T < 1933 K<br>830, T $\geq$ 1933 K  | 0.486T+725, T < 915 K<br>1170, T $\geq$ 915 K | 0.24T+420.8, T < 1723 K<br>790, T $\geq$ 1723 K   |
| Thermal conductivity (liquid)<br>$k_l$ ( $\frac{W}{m \cdot K}$ )                              | 0.0136T+1.3097, T < 1933 K<br>33.4, T $\geq$ 1933 K | 0.091T+152.5, T < 915 K<br>90, T $\geq$ 915 K | 0.0146T+10.3, T < 1723 K<br>26.9, T $\geq$ 1723 K |
| Solidus temperature $T_s$ (K)                                                                 | 1877                                                | 873                                           | 1658                                              |
| Liquidus temperature $T_l$ (K)                                                                | 1933                                                | 915                                           | 1723                                              |
| Latent heat of melting $L_m$ ( $\frac{J}{kg}$ )                                               | $2.86 \times 10^5$                                  | $3.8 \times 10^5$                             | $2.6 \times 10^5$                                 |
| Vaporization point $T_v$ (K)                                                                  | 3560                                                | 2792                                          | 3122                                              |
| Latent heat of vaporization<br>$L_v$ ( $\frac{J}{kg}$ )                                       | $9.255 \times 10^6$                                 | $1.053 \times 10^7$                           | $6.336 \times 10^6$                               |
| Minimal absorptivity $\eta_m$                                                                 | 0.26                                                | 0.01                                          | 0.33                                              |
| Molar mass $M_l$ ( $\frac{g}{mol}$ )                                                          | 48                                                  | 27                                            | 56                                                |
| Surface tension $\sigma$ ( $\frac{N}{m}$ )                                                    | 1.65                                                | 0.91                                          | 1.87                                              |
| Thermocapillary coefficient<br>$\frac{\partial \sigma}{\partial T}$ ( $\frac{N}{m \cdot K}$ ) | $-2.6 \times 10^{-4}$                               | $-3.5 \times 10^{-4}$                         | $-4.9 \times 10^{-4}$                             |
| Emissivity $\varepsilon$                                                                      | 0.3                                                 | 0.1                                           | 0.3                                               |
| Dynamic viscosity $\mu_l$ (Pa · s)                                                            | $2.66 \times 10^{-3}$                               | $1 \times 10^{-3}$                            | $8 \times 10^{-3}$                                |

**Table S1. Thermophysical properties of the employed materials (38).**

| Properties & units                                                     | Values                | Properties & units                      | Values                                                  |
|------------------------------------------------------------------------|-----------------------|-----------------------------------------|---------------------------------------------------------|
| <b>Properties of argon</b>                                             |                       | <b>Vaporization constants of Al6061</b> |                                                         |
| Molar mass $M_g$ ( $\frac{g}{mol}$ )                                   | 39.95                 | Low vaporization threshold $T_L$ (K)    | 2800                                                    |
| Heat capacity (liquid) $C_{pg}$ ( $\frac{J}{kg \cdot K}$ )             | 520                   | High vaporization threshold $T_L$ (K)   | 3200                                                    |
| Thermal conductivity (liquid) $k_g$ ( $\frac{W}{m \cdot K}$ )          | $1.7 \times 10^{-2}$  | Ablation rate constants $a_1/b_1$       | -1.78408 $\times 10^{-6}$ /<br>1.66819 $\times 10^{-2}$ |
| Dynamic viscosity $\mu_g$ (Pa · s)                                     | $2.26 \times 10^{-5}$ | Ablation rate constants $c_1/d_1$       | -5.14573 $\times 10^1$ /<br>5.24582 $\times 10^4$       |
| <b>Computational constants</b>                                         |                       | Surface pressure constants $a_2/b_2$    | 2.06397 $\times 10^{-4}$ /<br>-6.83622 $\times 10^{-1}$ |
| Mushy zone constant $A_{mush}$ ( $\frac{kg}{m^3 \cdot s}$ )            | $1 \times 10^8$       | Surface pressure constants $c_2/d_2$    | -1.02617 $\times 10^3$ /<br>3.80205 $\times 10^6$       |
| mushy zone constant $B$                                                | $1 \times 10^{-4}$    | <b>Vaporization constants of Ti64</b>   |                                                         |
| Atmospheric pressure $P_{atm}$ (Pa)                                    | $1 \times 10^5$       | Low vaporization threshold $T_L$ (K)    | 3320                                                    |
| Gas constant $R$ ( $\frac{J}{K \cdot mol}$ )                           | 8.314                 | High vaporization threshold $T_L$ (K)   | 3920                                                    |
| Retro-diffusion coefficient $\beta_R$                                  | 0.18                  | Ablation rate constants $a_1/b_1$       | -4.40396 $\times 10^{-7}$ /<br>4.79205 $\times 10^{-3}$ |
| Stefan-Boltzmann constant $\sigma_{SB}$ ( $\frac{kg}{s^3 \cdot K^4}$ ) | $5.67 \times 10^{-8}$ | Ablation rate constants $c_1/d_1$       | -1.72565 $\times 10^1$ /<br>2.05878 $\times 10^4$       |
| Ambient temperature $T_\infty$ (K)                                     | 293                   | Surface pressure constants $a_2/b_2$    | 2.98416 $\times 10^{-4}$ /<br>-3.21887                  |
| Mass diffusion coefficient $D$ ( $\frac{m^2}{s}$ )                     | $2 \times 10^{-5}$    | Surface pressure constants $c_2/d_2$    | 1.15055 $\times 10^4$ /<br>-1.35390 $\times 10^7$       |

**Table S2. Properties of argon gas, computational constants, and vaporization constants of the employed materials.**

| Dimensionless numbers | Ti64                  | Al6061                | SS316                 |
|-----------------------|-----------------------|-----------------------|-----------------------|
| Rayleigh number, Ra   | $6.68 \times 10^{-2}$ | $1.39 \times 10^{-2}$ | $8.45 \times 10^{-2}$ |
| Marangoni number, Ma  | $1.51 \times 10^3$    | $6.83 \times 10^2$    | $1.53 \times 10^3$    |
| Prandtl number, Pr    | $6.38 \times 10^{-2}$ | $1.30 \times 10^{-2}$ | $2.04 \times 10^{-1}$ |
| Weber number, We      | $6.10 \times 10^3$    | $1.26 \times 10^4$    | $2.82 \times 10^3$    |
| Bond number, Bo       | $2.33 \times 10^{-4}$ | $2.60 \times 10^{-4}$ | $3.61 \times 10^{-4}$ |
| Capillary number, Ca  | $2.58 \times 10^{-1}$ | $2.39 \times 10^{-1}$ | $3.75 \times 10^{-1}$ |

**Table S3. Dimensionless numbers related to fluid flow and surface tension of the employed materials. The dimensionless numbers are approximated based on the material properties at liquidus temperature.**

## **Movie S1 to S11.**

### **High-speed x-ray imaging of stationary and scanning laser melting of Al6061 – representative movies**

Movie S1: Progression of the melt pool and vapor depression in Al6061 bare plate under stationary laser illumination. The sample thickness is 0.75 mm. The imaging frame rate is 50,000 fps. The laser spot size is 88  $\mu\text{m}$ , the power is 416 W, the scan speed is 0.3 m/s. The pixel resolution of 1.98  $\mu\text{m}$ . The exposure time for each image is 1  $\mu\text{s}$ .

Movie S2: Progression of the melt pool and vapor depression in Al6061 bare plate under stationary laser illumination. The sample thickness is 0.75 mm. The imaging frame rate is 50,000 fps. The laser spot size is 88  $\mu\text{m}$ , the power is 416 W, the scan speed is 0.6 m/s. A pixel resolution of 1.98  $\mu\text{m}$ . The exposure time for each image is 1  $\mu\text{s}$ .

Movie S3: Progression of the melt pool and vapor depression in Al6061 bare plate under stationary laser illumination. The sample thickness is 0.75 mm. The imaging frame rate is 50,000 fps. The laser spot size is 88  $\mu\text{m}$ , the power is 416 W, the scan speed is 0.9 m/s. A pixel resolution of 1.98  $\mu\text{m}$ . The exposure time for each image is 1  $\mu\text{s}$ .

Movie S4: Progression of the melt pool and vapor depression in Al6061 bare plate under stationary laser illumination. The sample thickness is 0.75 mm. The imaging frame rate is 50,000 fps. The laser spot size is 88  $\mu\text{m}$ , the power is 416 W, the scan speed is 0.75 m/s. A pixel resolution of 1.98  $\mu\text{m}$ . The exposure time for each image is 1  $\mu\text{s}$ .

Movie S5: Progression of the melt pool and vapor depression in Al6061 bare plate under stationary laser illumination. The sample thickness is 0.75 mm. The imaging frame rate is 50,000 fps. The laser spot size is 88  $\mu\text{m}$ , the power is 416 W, the scan speed is 0.45 m/s. A pixel resolution of 1.98  $\mu\text{m}$ . The exposure time for each image is 1  $\mu\text{s}$ .

Movie S6: Progression of the melt pool and vapor depression in Al6061 bare plate under stationary laser illumination. The sample thickness is 0.75 mm. The imaging frame rate is 50,000 fps. The laser spot size is 88  $\mu\text{m}$ , the power is 520 W, the scan speed is 0.3 m/s. A pixel resolution of 1.98  $\mu\text{m}$ . The exposure time for each image is 1  $\mu\text{s}$ .

Movie S7: Progression of the melt pool and vapor depression in Al6061 bare plate under stationary laser illumination. The sample thickness is 0.75 mm. The imaging frame rate is 50,000 fps. The laser spot size is 88  $\mu\text{m}$ , the power is 520 W, the scan speed is 0.45 m/s. A pixel resolution of 1.98  $\mu\text{m}$ . The exposure time for each image is 1  $\mu\text{s}$ .

Movie S8: Progression of the melt pool and vapor depression in Al6061 bare plate under stationary laser illumination. The sample thickness is 0.75 mm. The imaging frame rate is 50,000 fps. The laser spot size is 88  $\mu\text{m}$ , the power is 520 W, the scan speed is 0.6 m/s. A pixel resolution of 1.98  $\mu\text{m}$ . The exposure time for each image is 1  $\mu\text{s}$ .

Movie S9: Progression of the melt pool and vapor depression in Al6061 bare plate under

stationary laser illumination. The sample thickness is 0.75 mm. The imaging frame rate is 50,000 fps. The laser spot size is 88  $\mu\text{m}$ , the power is 520 W, the scan speed is 0.9 m/s. A pixel resolution of 1.98  $\mu\text{m}$ . The exposure time for each image is 1  $\mu\text{s}$ .

Movie S10: Progression of the melt pool and vapor depression in Al6061 bare plate under stationary laser illumination. The sample thickness is 0.75 mm. The imaging frame rate is 50,000 fps. The laser spot size is 88  $\mu\text{m}$ , the power is 520 W, the scan speed is 1.2 m/s. A pixel resolution of 1.98  $\mu\text{m}$ . The exposure time for each image is 1  $\mu\text{s}$ .

Movie S11: Progression of the melt pool and vapor depression in Al6061 bare plate under stationary laser illumination. The sample thickness is 0.75 mm. The imaging frame rate is 50,000 fps. The laser spot size is 88  $\mu\text{m}$ , the power is 520 W, the scan speed is 0.75 m/s. A pixel resolution of 1.98  $\mu\text{m}$ . The exposure time for each image is 1  $\mu\text{s}$ .

### Data S1 to S2.

Data S1: Dataset including all process parameters, material properties, and measured keyhole dimensions.

Data S2: Dataset including transient powers with different process parameters and material properties.

### References and Notes:

1. J. H. Martin, B. D. Yahata, J. M. Hundley, J. A. Mayer, T. A. Schaedler, T. M. Pollock, 3D printing of high-strength aluminum alloys. *Nature* **549**, 365 (2017).
2. R. Cunningham, C. Zhao, N. Parab, C. Kantzos, J. Pauza, K. Fezzaa, T. Sun, A. D. Rollett, Keyhole threshold and morphology in laser melting revealed by ultrahigh-speed x-ray imaging. *Science* **363**, 849-852 (2019).
3. J. Ye, S. A. Khairallah, A. M. Rubenchik, M. F. Crumb, G. Guss, J. Belak, M. J. Matthews, Energy Coupling Mechanisms and Scaling Behavior Associated with Laser Powder Bed Fusion Additive Manufacturing. *Adv. Eng. Mater.* **16**, 1900185 (2019).
4. A. M. Rubenchik, W. E. King, S. S. Wu, Scaling laws for the additive manufacturing. *J. Mater. Process. Tech.* **257**, 234-243 (2018).
5. R. Fabbro, M. Dal, P. Peyre, F. Coste, M. Schneider, V. Gunenthiram, Analysis and possible estimation of keyhole depths evolution using laser operating parameters and material properties. *J. Laser Appl.* **30**, 032410 (2018).
6. Z. Wang, M. Liu, Dimensionless analysis on selective laser melting to predict porosity and track morphology. *J. Mater. Process. Technol.* **273**, 116238 (2019).
7. S. A. Khairallah, A. T. Anderson, A. Rubenchik, W. E. King, Laser powder-bed fusion additive manufacturing: Physics of complex melt flow and formation mechanisms of pores, spatter, and denudation zones. *Acta Mater.* **108**, 36–45 (2016).

8. C. Zhao, Q. Guo, X. Li, N. Parab, K. Fezzaa, W. Tan, L. Chen, T. Sun, Bulk-explosion-induced metal spattering during laser processing. *Phys. Rev. X* **9**, 021052 (2019).
9. T. DebRoy, H.L. Wei, J.S. Zuback, T. Mukherjee, J.W. Elmer, J.O. Milewski, A.M. Beese, A.D. Wilson-Heid, A. De and W. Zhang, Additive manufacturing of metallic components—process, structure and properties. *Prog. Mater. Sci.* **92**, 112-224 (2018).
10. S.A. Khairallah, A.A. Martin, J.R. Lee, G. Guss, N.P. Calta, J.A. Hammons, M.H. Nielsen, K. Chaput, E. Schwalbach, M.N. Shah and M.G. Chapman, Controlling interdependent meso-nanosecond dynamics and defect generation in metal 3D printing. *Science*, **368**, 660-665 (2020).
11. D. T. Swift-Hook, A. E. F. Gick, Penetration welding with lasers. *Weld. J.* **52**, 492s-499s (1973).
12. C. Zhao, K. Fezzaa, R.W. Cunningham, H. Wen, F. De Carlo, L. Chen, A.D. Rollett, T. Sun, Real-time monitoring of laser powder bed fusion process using high-speed X-ray imaging and diffraction. *Sci. Rep.* **7**, 1-11 (2017).
13. N.D. Parab, C. Zhao, R. Cunningham, L.I. Escano, K. Fezzaa, W. Everhart, A.D. Rollett, L. Chen, T. Sun, Ultrafast X-ray imaging of laser–metal additive manufacturing processes. *J. Synchrotron Radiat.* **25**, 1467-1477 (2018).
14. C.L.A. Leung, S. Marussi, R.C. Atwood, M. Towrie, P.J. Withers, P.D. Lee, In situ X-ray imaging of defect and molten pool dynamics in laser additive manufacturing. *Nat. Commun.* **9**, 1-9 (2018).
15. N.P. Calta, J. Wang, A.M. Kiss, A.A. Martin, P.J. Depond, G.M. Guss, V. Thampy, A.Y. Fong, J.N. Weker, K.H. Stone, C.J. Tassone, An instrument for in situ time-resolved X-ray imaging and diffraction of laser powder bed fusion additive manufacturing processes. *Rev. Sci. Instrum.* **89**, 055101 (2018).
16. S.M.H. Hojjatzadeh, N.D. Parab, W. Yan, Q. Guo, L. Xiong, C. Zhao, M. Qu, L.I. Escano, X. Xiao, K. Fezzaa, W. Everhart, Pore elimination mechanisms during 3D printing of metals. *Nat. Commun.* **10**, 1-8 (2019).
17. G. Kasperovich, J. Haubrich, J. Gussone, G. Requena, Correlation between porosity and processing parameters in TiAl6V4 produced by selective laser melting. *Mater. Des.* **105**, 160–170 (2016).
18. M. Tang, P. C. Pistorius, Oxides, porosity and fatigue performance of AlSi10Mg parts produced by selective laser melting. *Int. J. Fatigue* **94**, 192–201 (2017).
19. C. Weingarten, D. Buchbinder, N. Pirch, W. Meiners, K. Wissenbach, R. Poprawe, Formation and reduction of hydrogen porosity during selective laser melting of AlSi10Mg. *J. Mater. Process. Technol.* **221**, 112-120 (2015).
20. G. I. Barenblatt, *Scaling* (Cambridge University Press, Cambridge, UK, 2003).
21. E. Buckingham, On physically similar systems; illustrations of the use of dimensional equations. *Phys. Rev.* **4**, 345 (1914).
22. J. R. Koza, *Genetic programming* (MIT Press, Cambridge, MA, 1992).
23. Y. A. Mayi, M. Dal, P. Peyre, M. Bellet, C. Metton, C. Moriconi, R. Fabbro, Laser-induced plume investigated by finite element modelling and scaling of particle entrainment in laser powder bed fusion. *J. Phy. D: Appl. Phys.* **53**, 075306 (2019).



24. P. Kumar, J. Farah, J. Akram, C. Teng, J. Ginn, M. Misra, Influence of laser processing parameters on porosity in Inconel 718 during additive manufacturing. *Inter. J. of Adv. Manuf. Tech.* **103**, 1497-1507 (2019).
25. J. A. Cherry, H. M. Davies, S. Mehmood, N. P. Lavery, S. G. Brown, J. Sienz, Investigation into the effect of process parameters on microstructural and physical properties of 316L stainless steel parts by selective laser melting. *Int. J. Adv. Manuf. Technol.* **76**, 869-879 (2015).
26. A. Leicht, M. Rashidi, U. Klement, E. Hryha, Effect of process parameters on the microstructure, tensile strength and productivity of 316L parts produced by laser powder bed fusion. *Mater. Charact.* **159**, 110016 (2020).
27. J. C. Simmons, X. Chen, A. Azizi, M. A. Daeumer, P. Y. Zavalij, G. Zhou, S. N. Schiffres, Influence of processing and microstructure on the local and bulk thermal conductivity of selective laser melted 316L stainless steel. *Addit. Manuf.* **32**, 100996 (2020).
28. T. Ferreira, W. Rasband, <https://imagej.nih.gov/ij/> (2012).
29. Z. Gan, G. Yu, X. He, S. Li, Numerical simulation of thermal behavior and multicomponent mass transfer in direct laser deposition of Co-base alloy on steel. *Int. J. Heat Mass Transf.* **104**, 28-38 (2017).
30. A. A. Samokhin, Effect of laser radiation on absorbing condensed matter. *Proceedings of the Institute of General Physics Academy of Sciences of the USSR. Series Editor: AM Prokhorov*, **13**, 203 (1990).
31. D. Kondepudi, I. Prigogine, Modern thermodynamics: from heat engines to dissipative structures (John Wiley & Sons, 2014).
32. S. W. Han, J. Ahn, S. J. Na, A study on ray tracing method for CFD simulations of laser keyhole welding: progressive search method. *Weld. World* **60**, 247-258 (2016).
33. S. Pang, L. Chen, J. Zhou, Y. Yin, T. Chen, A three-dimensional sharp interface model for self-consistent keyhole and weld pool dynamics in deep penetration laser welding. *J. Phys. D* **44**, 025301 (2010).
34. Ansys Inc, ANSYS FLUENT theory guide: Release 2020 R1 (Canonsburg, PA, 2020).
35. C. W. Hirt, B. D. Nichols, Volume of fluid (VOF) method for the dynamics of free boundaries. *J. Comput. Phys.* **39**, 201-225 (1981).
36. W. E. King, A. T. Anderson, R. M. Ferencz, N. E. Hodge, C. Kamath, S. A. Khairallah, A. M. Rubenchik, Laser powder bed fusion additive manufacturing of metals; physics, computational, and materials challenges. *Appl. Phys. Rev.* **2**, 041304 (2015).
37. A. Arora, G. G. Roy, T. DebRoy, Unusual wavy weld pool boundary from dimensional analysis. *Scr. Mater.* **60**, 68-71 (2009).
38. J. J. Valencia, N. Q. Peter, Thermophysical properties. (2013).
